# Supplementary material for: Synergy of oxygen defects and structural modulation on titanium niobium oxide with a constructed conductive network for high-rate lithium-ion half/full batteries
Source: Royal Society of Chemistry journal article supplement (doi:10.1039/d3qi00182b), 2023-01-01
Supplement: d3qi00182b1.pdf [file d3qi00182b1.pdf]

## Synergy of oxygen defects and structural modulation on titanium niobium oxide with constructed conductive network for high-rate lithium-ion half/full batteries

Yangyang Sui<sup>a</sup>, Jinpeng Guan<sup>a</sup>, Kaiyang Li<sup>a</sup>, Yubo Feng<sup>a</sup>, Shengjie Peng<sup>c</sup>, Maxim Yu.

Maximov<sup>d</sup>, Quan Liu<sup>a\*</sup>, Jun Yang<sup>b\*</sup>, Hongbo Geng<sup>a\*</sup>

<sup>a</sup>School of Materials Engineering, Changshu Institute of Technology, Changshu, Jiangsu 215500, China. E-mail address: njutlq@163.com; hbgeng@gdut.edu.cn

<sup>b</sup>School of Material Science and Engineering, Jiangsu University of Science and Technology, Zhenjiang, 212003, China. E-mail address: iamjyang@just.edu.cn

<sup>c</sup>College of Materials Science and Technology, Nanjing University of Aeronautics and Astronautics, Nanjing 210016, China

<sup>d</sup>Peter the Great Saint-Petersburg Polytechnic University, 195251 Saint Petersburg, Russia

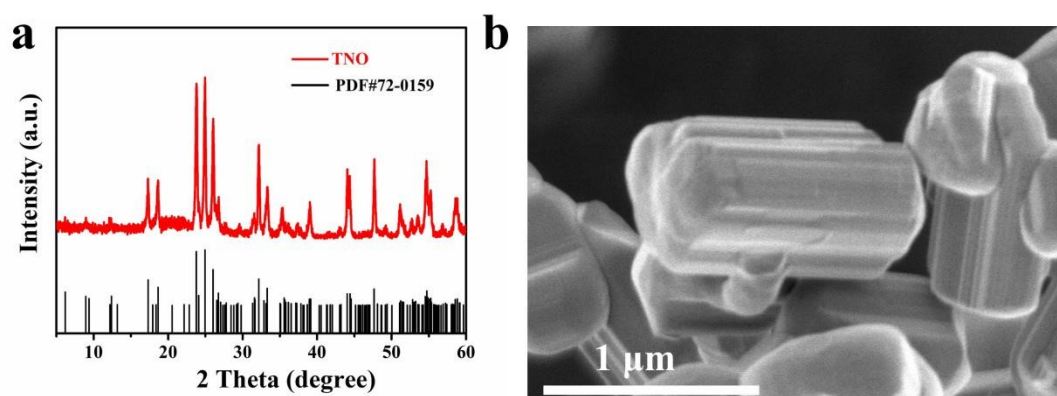

**Fig. S1** Microstructure and morphology of TNO. (a) XRD pattern; (b) SEM images.

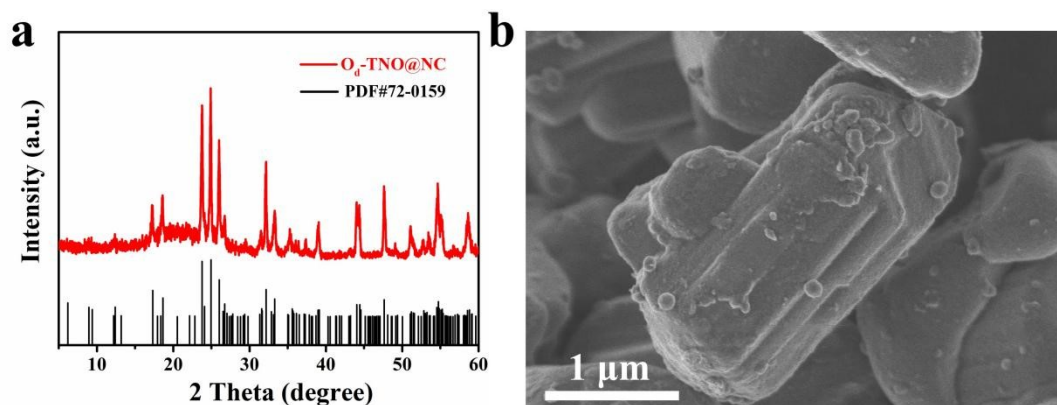

**Fig. S2** Microstructure and morphology of  $O_d$ -TNO@NC. (a) XRD pattern; (b) SEM images.

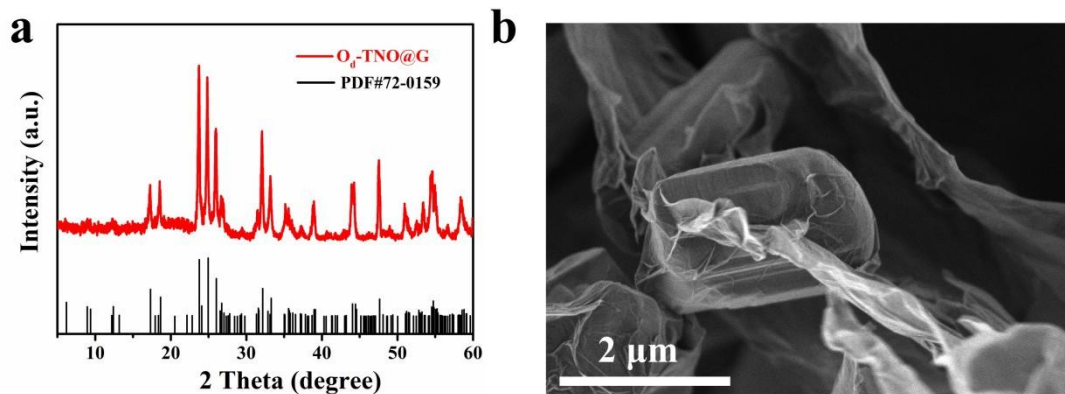

**Fig. S3** Microstructure and morphology of  $O_d$ -TNO@G. (a) XRD pattern; (b) SEM images.

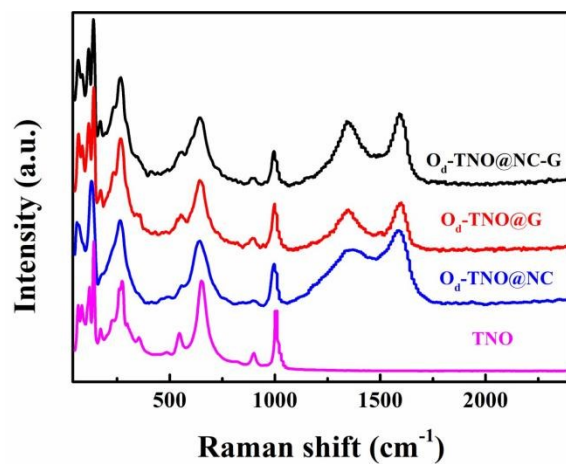

**Fig. S4** Raman spectra of the TNO, O<sub>d</sub>-TNO@NC, O<sub>d</sub>-TNO@G and O<sub>d</sub>-TNO@NC-G.

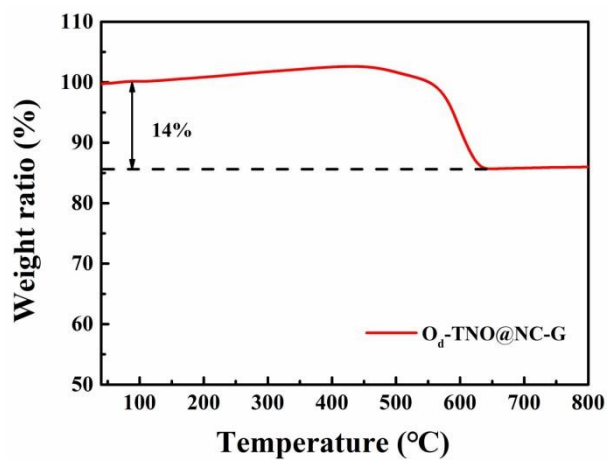

**Fig. S5** TGA curve of O<sub>d</sub>-TNO@NC-G.

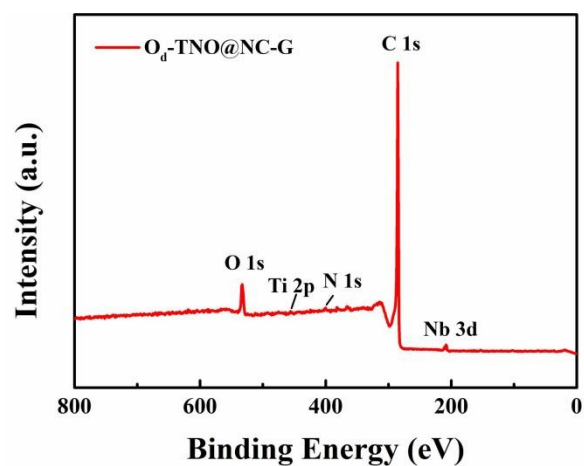

Fig. S6 XPS survey spectrum of  $O_d$ -TNO@NC-G.

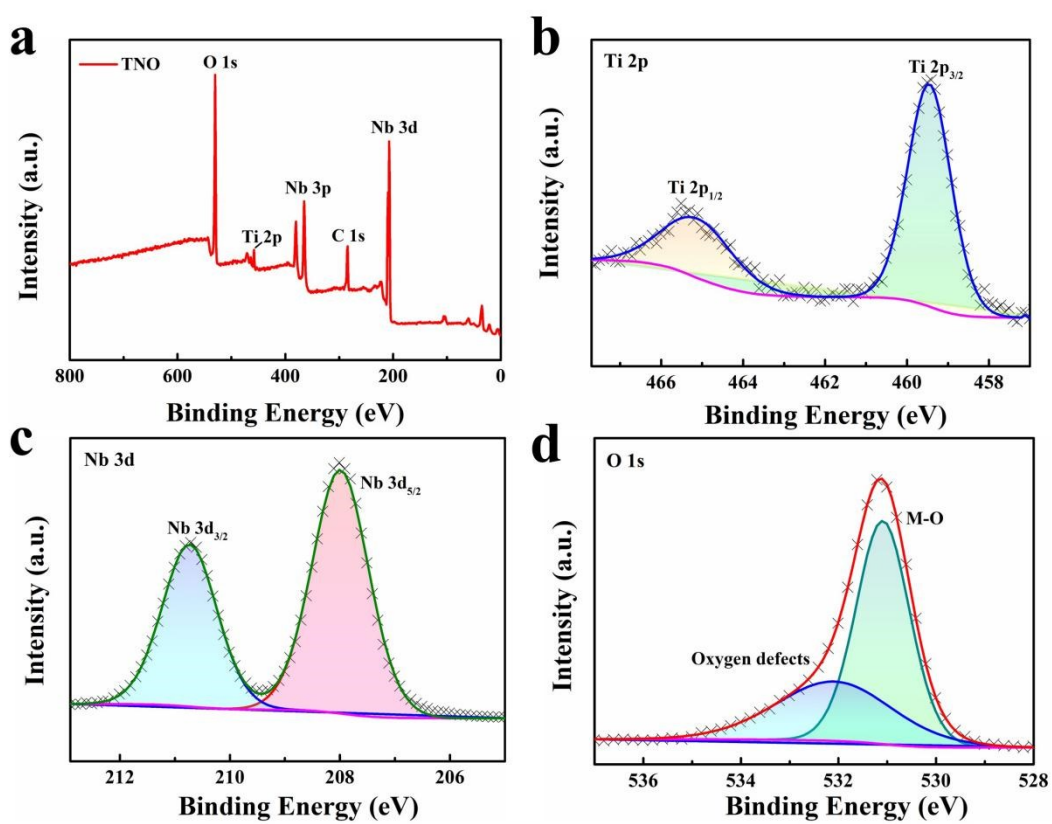

Fig. S7 (a) XPS survey spectrum of TNO; (b) Ti 2p; (c) Nb 3d; (d) O 1s.

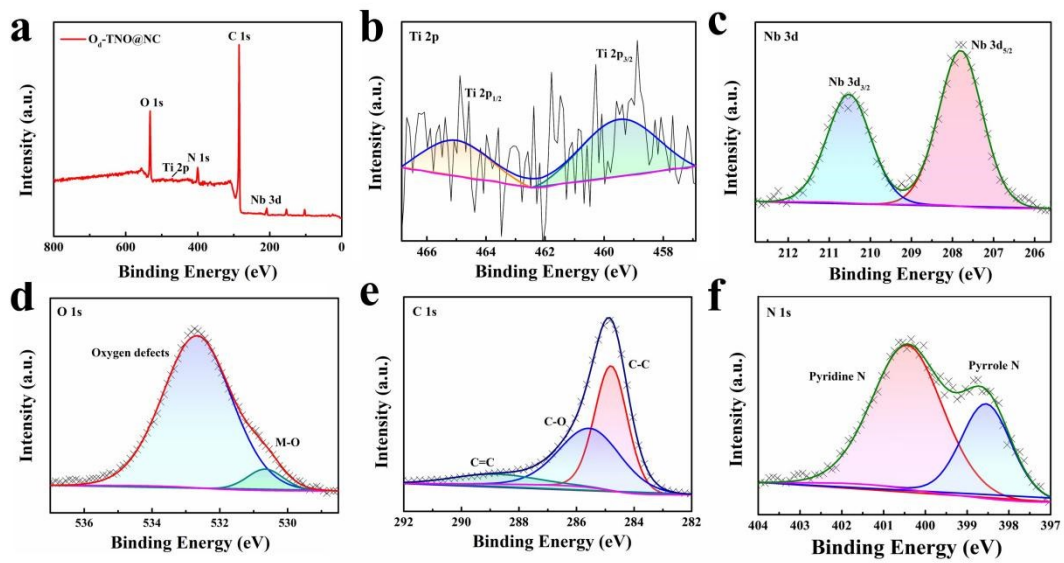

**Fig. S8** (a) XPS survey spectrum of  $O_d$ -TNO@NC; (b) Ti 2p; (c) Nb 3d; (d) O 1s; (e) C 1s; (f) N 1s.

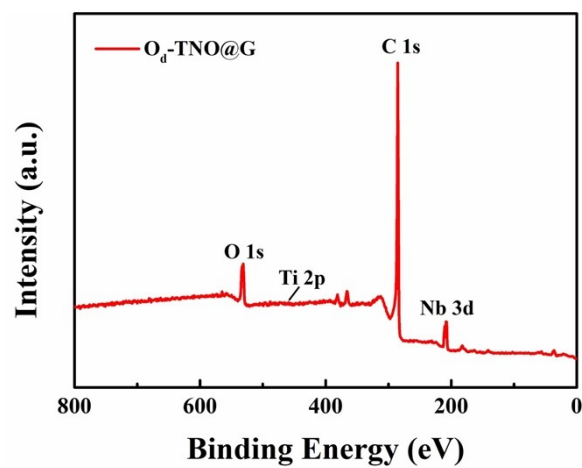

**Fig. S9** XPS survey spectrum of  $O_d$ -TNO@G;

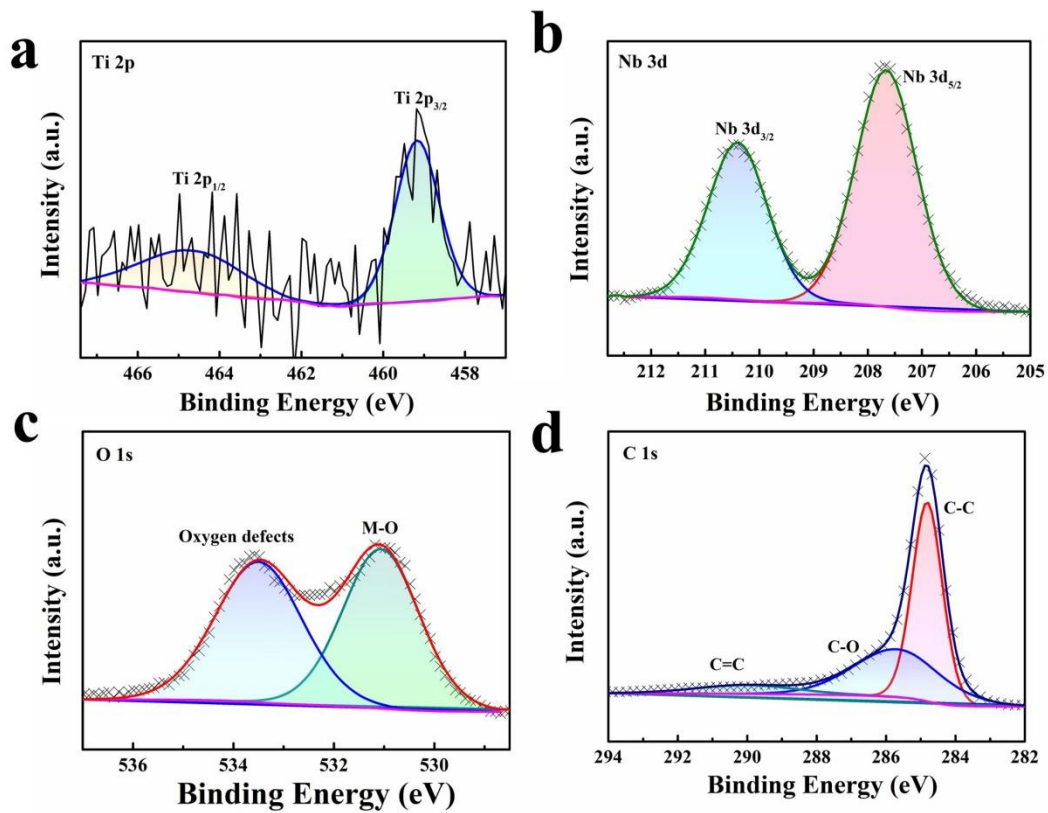

Fig. S10 XPS spectra of  $O_d$ -TNO@G; (a) Ti 2p; (b) Nb 3d; (c) O 1s; (d) C 1s.

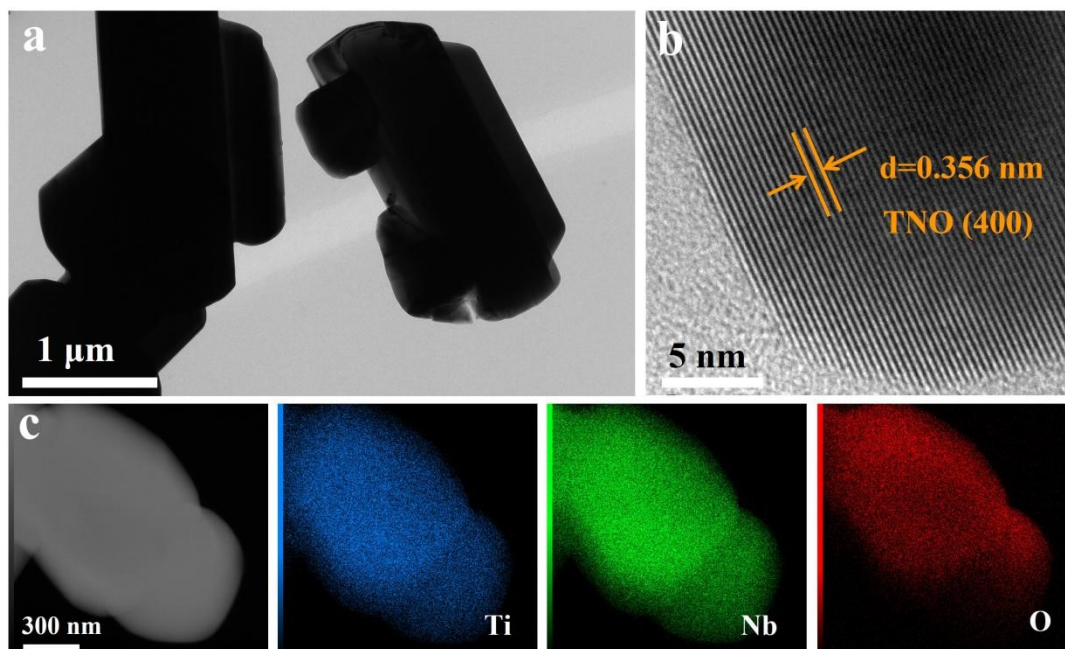

Fig. S11 (a) TEM and (b) HR-TEM images of the TNO; (c) HAADF-STEM image and EDX mappings of the TNO.

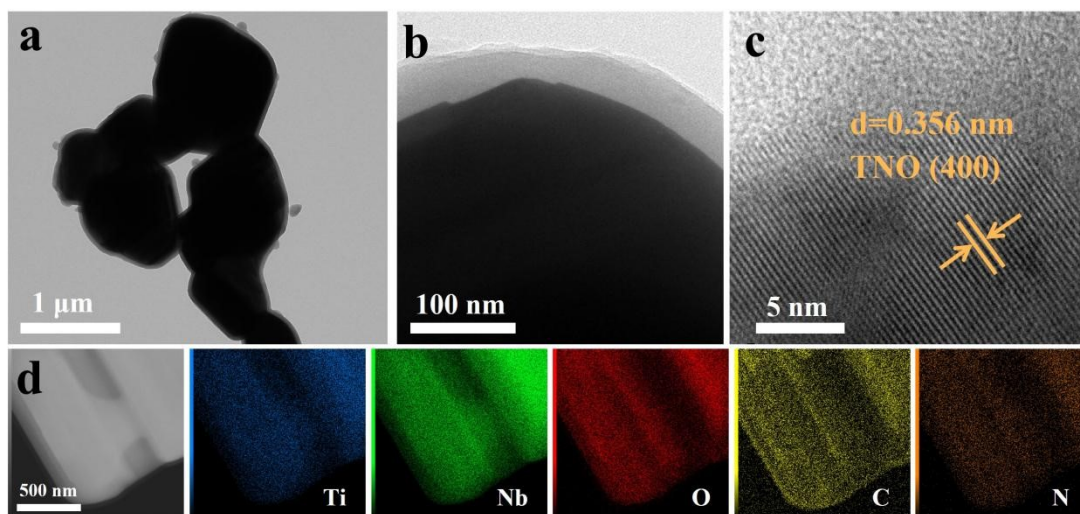

**Fig. S12** (a and b) TEM and (c) HR-TEM images of the  $O_d$ -TNO@NC; (d) HAADF-STEM image and EDX mappings of the  $O_d$ -TNO@NC.

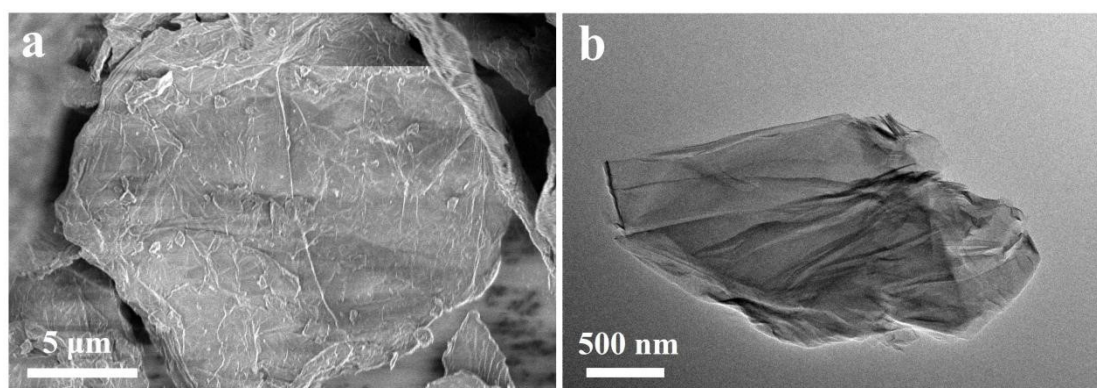

**Fig. S13** (a) SEM and (b) TEM images of the GO.

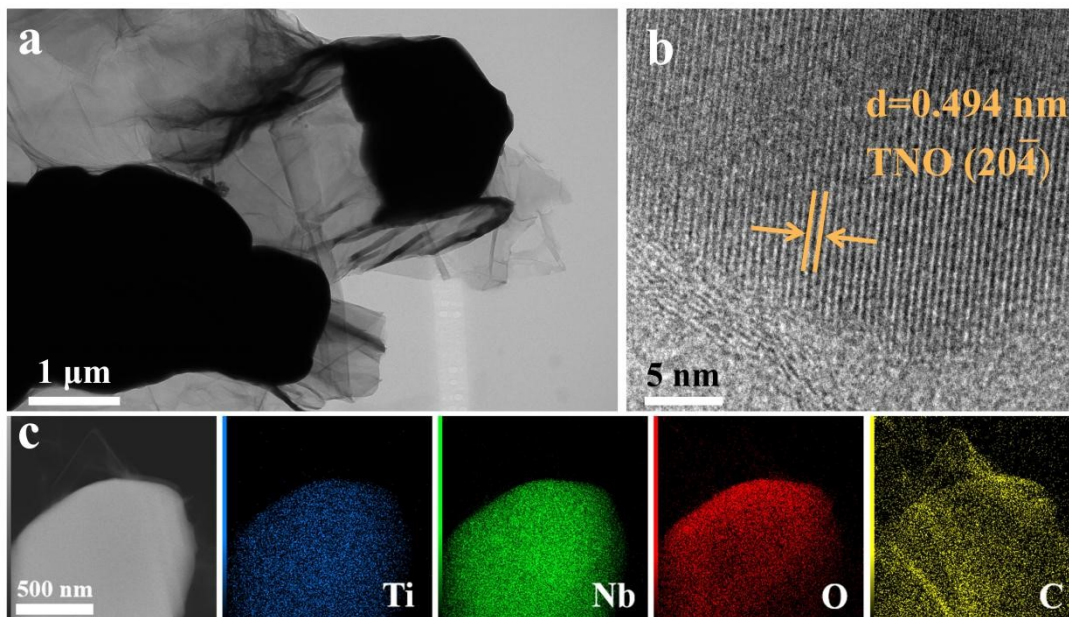

**Fig. S14** (a) TEM and (b) HR-TEM images of the  $O_d$ -TNO@G; (c) HAADF-STEM image and EDX mappings of the  $O_d$ -TNO@G.

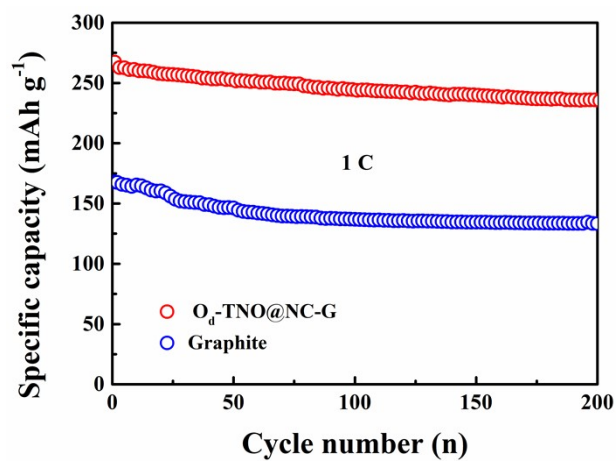

**Fig. S15** Cycling performance at 1 C of the  $O_d$ -TNO@NC-G and commercial graphite (Hefei Kejing Material Technology Co., LTD, 99%).



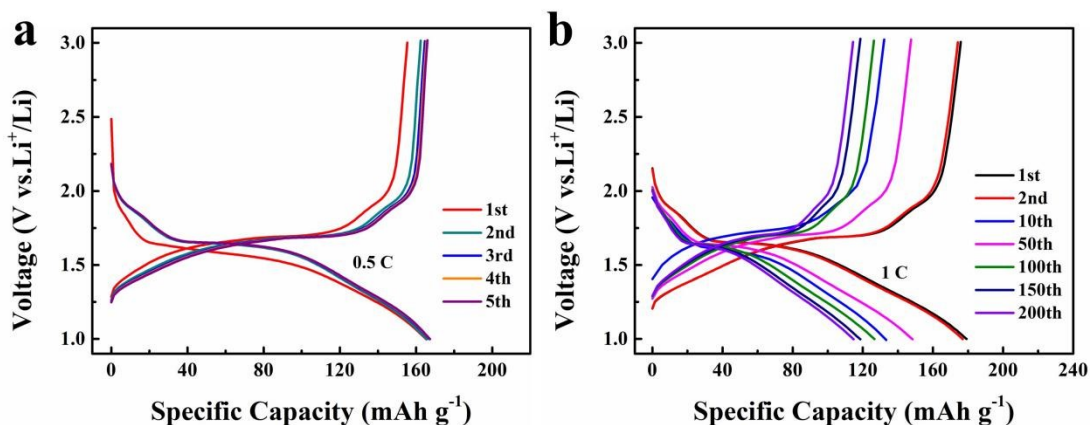

**Fig. S16** (a) The GCD curves at 0.5 C and (b) typical charge–discharge curves at 1 C at different cycles of the TNO.

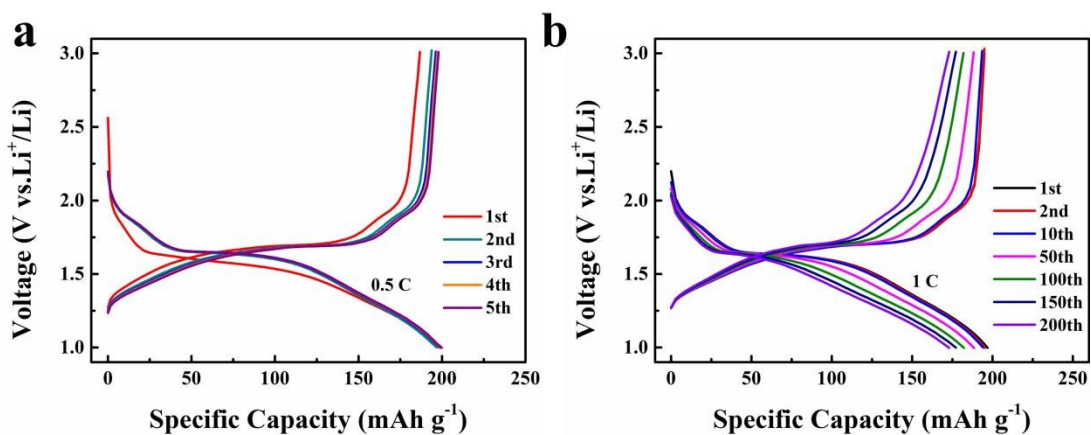

**Fig. S17** (a) The GCD curves at 0.5 C and (b) typical charge–discharge curves at 1 C at different cycles of the O<sub>d</sub>-TNO@NC.

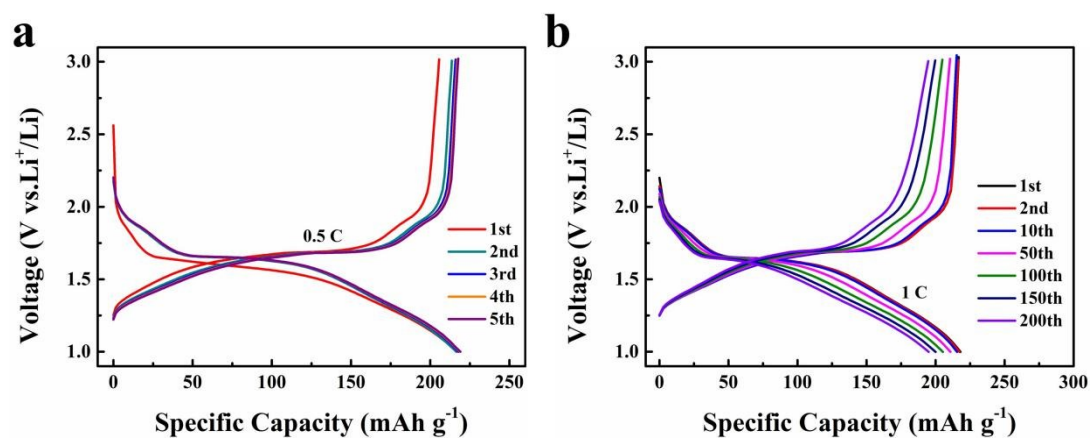

**Fig. S18** (a) The GCD curves at 0.5 C and (b) typical charge–discharge curves at 1 C at different cycles of the O<sub>d</sub>-TNO@G.

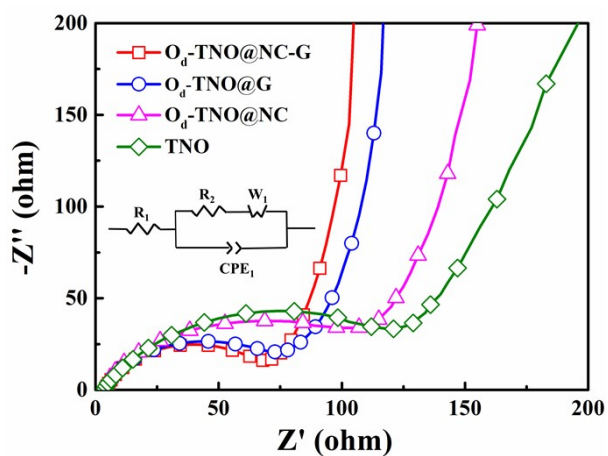

**Fig. S19** EIS spectra of TNO,  $O_d$ -TNO@NC,  $O_d$ -TNO@G and  $O_d$ -TNO@NC-G (Inset is the corresponding equivalent circuit).

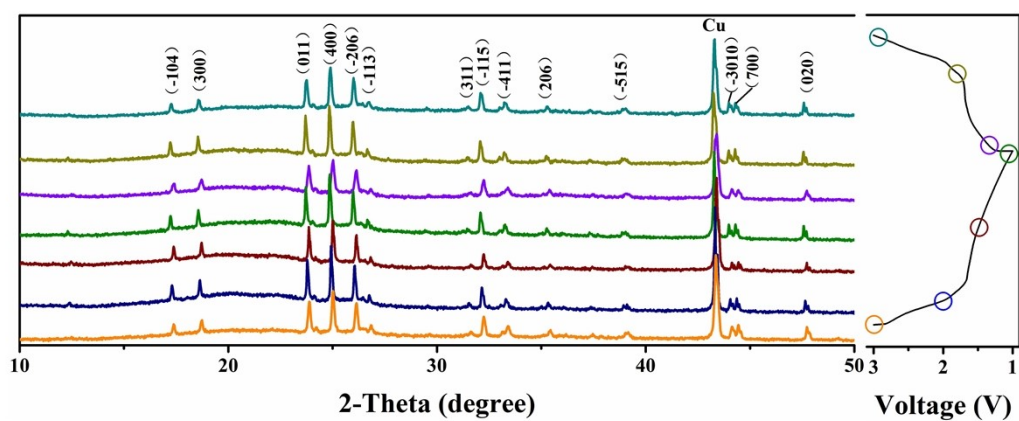

**Fig. S20** Ex-situ XRD patterns of the  $O_d$ -TNO@NC-G anode measured at various discharge/charge states.
